# Supplementary material for: Comprehensive Genomic Characterization of Tumor Microenvironment and Relevant Signature in Clear Cell Renal Cell Carcinoma
Source: Front Oncol. 2022 May 16;12:749119. doi: 10.3389/fonc.2022.749119 (PMC9149313; doi:10.3389/fonc.2022.749119)
Supplement: Supplementary file 10 [file Table_4.xlsx]

## Sheet: TMEscore high
Arm	Genes	Amp frequency	Amp frequency score	Amp z-score	Amp q-value	Del frequency	Del frequency score	Del z-score	Del q-value
1p	2121	0.02	0.02	-1.61	1	0.09	0.09	2.36	0.0287
1q	1955	0.08	0.08	1.32	0.292	0.06	0.07	0.576	0.609
2p	924	0.12	0.12	1.34	0.292	0.02	0.02	-2.73	1
2q	1556	0.13	0.13	2.87	0.0085	0.02	0.02	-2.15	1
3p	1062	0.02	0.1	0.256	0.993	0.85	0.86	32.1	0
3q	1139	0.11	0.13	1.98	0.0885	0.22	0.24	6.47	3.34e-10
4p	489	0	0	-3.68	1	0.12	0.12	0.623	0.608
4q	1049	0	0	-3.3	1	0.11	0.11	1.17	0.31
5p	270	0.34	0.34	8.38	0	0.01	0.01	-2.98	1
5q	1427	0.56	0.56	21.8	0	0.01	0.02	-1.63	1
6p	1173	0.02	0.03	-2.16	1	0.13	0.13	2.12	0.05
6q	839	0.01	0.01	-2.94	1	0.2	0.2	4.49	1.85e-05
7p	641	0.23	0.23	4.91	3.71e-06	0	0	-3.36	1
7q	1277	0.23	0.23	6.45	5.7e-10	0	0	-2.93	1
8p	580	0.01	0.01	-2.96	1	0.27	0.27	6.57	2.1e-10
8q	859	0.04	0.05	-1.62	1	0.19	0.2	4.1	9.51e-05
9p	422	0.01	0.01	-3.1	1	0.26	0.26	5.65	4.74e-08
9q	1113	0	0	-3	1	0.25	0.25	6.95	1.82e-11
10p	409	0.04	0.04	-2.26	1	0.11	0.12	0.389	0.715
10q	1268	0.02	0.03	-1.98	1	0.17	0.17	3.94	0.000165
11p	862	0.04	0.04	-2.04	1	0.04	0.04	-2.04	1
11q	1515	0.03	0.03	-1.65	1	0.05	0.05	-0.989	1
12p	575	0.18	0.18	3.05	0.00592	0	0	-3.5	1
12q	1447	0.17	0.17	4.59	1.53e-05	0	0	-2.9	1
13q	654	0.05	0.05	-1.73	1	0.11	0.12	0.756	0.542
14q	1341	0.01	0.01	-2.13	1	0.39	0.39	14	0
15p	0	0.36	0.52	11.8	0	0.31	0.48	10.2	0
15q	1355	0.02	0.02	-2.17	1	0.05	0.05	-1.21	1
16p	872	0.2	0.2	4.25	6.13e-05	0.01	0.01	-2.93	1
16q	702	0.17	0.17	2.89	0.0085	0.04	0.05	-1.84	1
17p	683	0.05	0.06	-1.55	1	0.06	0.06	-1.28	1
17q	1592	0.09	0.09	1.22	0.328	0.02	0.02	-1.82	1
18p	143	0.05	0.05	-2.08	1	0.15	0.16	1.47	0.193
18q	446	0.05	0.06	-1.71	1	0.18	0.19	3.07	0.00364
19p	995	0.05	0.05	-1.37	1	0.01	0.01	-3.14	1
19q	1709	0.05	0.05	-0.441	1	0	0	-2.88	1
20p	355	0.11	0.11	0.223	0.993	0.02	0.02	-3.2	1
20q	753	0.11	0.11	0.71	0.653	0	0	-3.51	1
21p	13	0.09	0.11	-0.187	1	0.21	0.23	3.76	0.000316
21q	509	0.07	0.07	-1.07	1	0.08	0.09	-0.529	1
22q	921	0.05	0.05	-1.54	1	0.08	0.09	-0.093	1

## Sheet: TMEscore low
Table S4. Amplications and deletions of CNV in KIRC samples based on GISTIC software.
Arm	Genes	Amp frequency	Amp frequency score	Amp z-score	Amp q-value	Del frequency	Del frequency score	Del z-score	Del q-value
1p	2121	0.05	0.06	-0.0435	0.999	0.1	0.11	1.82	0.112
1q	1955	0.12	0.12	1.98	0.0697	0.06	0.07	0.224	0.862
2p	924	0.16	0.16	1.17	0.309	0	0	-2.88	0.999
2q	1556	0.17	0.17	2.65	0.0167	0	0	-2.44	0.999
3p	1062	0.03	0.12	0.23	0.883	0.79	0.81	19.8	0
3q	1139	0.12	0.14	0.968	0.402	0.17	0.19	2.36	0.0411
4p	489	0	0	-3.16	0.999	0.16	0.16	0.584	0.637
4q	1049	0	0	-2.8	0.999	0.16	0.16	1.36	0.255
5p	270	0.32	0.33	4.62	1.28e-05	0.01	0.02	-2.55	0.999
5q	1427	0.53	0.54	13.6	0	0.01	0.03	-1.31	0.999
6p	1173	0.01	0.02	-2.33	0.999	0.14	0.14	1.22	0.302
6q	839	0.01	0.02	-2.48	0.999	0.19	0.2	2.17	0.0594
7p	641	0.31	0.31	4.9	4.01e-06	0	0	-2.77	0.999
7q	1277	0.35	0.35	7.49	7.08e-13	0	0	-2.32	0.999
8p	580	0.01	0.02	-2.39	0.999	0.31	0.32	4.85	4.13e-06
8q	859	0.09	0.11	-0.176	0.999	0.17	0.19	1.81	0.112
9p	422	0.01	0.02	-2.3	0.999	0.39	0.39	6.57	2.09e-10
9q	1113	0.01	0.02	-1.84	0.999	0.4	0.41	8.62	0
10p	409	0.01	0.02	-2.88	0.999	0.14	0.14	0.2	0.862
10q	1268	0.01	0.02	-2.21	0.999	0.17	0.17	2.15	0.0594
11p	862	0.03	0.03	-2.47	0.999	0	0	-3.14	0.999
11q	1515	0.03	0.03	-1.85	0.999	0.03	0.03	-1.85	0.999
12p	575	0.27	0.28	3.82	0.000392	0.01	0.02	-2.49	0.999
12q	1447	0.26	0.26	5.29	6.35e-07	0.01	0.02	-1.91	0.999
13q	654	0.08	0.09	-0.853	0.999	0.14	0.15	0.742	0.552
14q	1341	0.03	0.06	-0.62	0.999	0.58	0.6	15	0
15p	0	0.3	0.45	5.83	3.86e-08	0.34	0.48	6.61	1.91e-10
15q	1355	0.03	0.03	-1.9	0.999	0.08	0.08	-0.414	0.999
16p	872	0.21	0.21	2.58	0.0185	0.01	0.02	-2.43	0.999
16q	702	0.18	0.19	1.66	0.132	0.03	0.03	-2.21	0.999
17p	683	0.01	0.01	-2.87	0.999	0.05	0.05	-1.9	0.999
17q	1592	0.03	0.03	-1.77	0.999	0.03	0.03	-1.77	0.999
18p	143	0.03	0.03	-2.45	0.999	0.25	0.25	2.54	0.0284
18q	446	0.03	0.03	-2.28	0.999	0.23	0.24	2.66	0.0232
19p	995	0.14	0.14	0.913	0.412	0	0	-2.86	0.999
19q	1709	0.14	0.14	2.13	0.0527	0	0	-2.36	0.999
20p	355	0.23	0.23	2.39	0.0285	0	0	-3.09	0.999
20q	753	0.25	0.25	3.37	0.0019	0	0	-2.83	0.999
21p	13	0.23	0.28	2.72	0.0148	0.16	0.2	1.03	0.387
21q	509	0.1	0.12	-0.357	0.999	0.12	0.13	-0.0461	0.999
22q	921	0.1	0.11	0.0173	0.999	0.09	0.1	-0.319	0.999
